# Supplementary material for: Evaluating the Nutritional Properties of Food: A Scoping Review
Source: MDPI journal article supplement (doi:10.3390/nu14112352), 2022-06-05
Supplement: s1 [file s1]

**Table S1 The detailed search strategies and results in the databases**

| Database       | Search strategies                                                                                                                                                                                                                                                                                                                                                                                                                                                                                                                                                                    | Results    |
|----------------|--------------------------------------------------------------------------------------------------------------------------------------------------------------------------------------------------------------------------------------------------------------------------------------------------------------------------------------------------------------------------------------------------------------------------------------------------------------------------------------------------------------------------------------------------------------------------------------|------------|
| Web of science | ((((TS=(Food Quality)) OR TS=(Food Qualities)) OR TS=(Qualities, Food)) OR TS=(Quality, Food) AND TS=(Diet, Food, and Nutrition) AND (((TS=(Nutrients)) OR TS=(Nutrient)) OR TS=(Macronutrients)) OR TS=(Macronutrient) AND (((TS=(evaluation)) OR TS=(evaluate tool)) OR TS=(evaluation method)) OR TS=(evaluation indicator) AND TS=(method))                                                                                                                                                                                                                                      | 3004 items |
| PubMed         | (((((food[MeSH Terms]) AND (Food Quality[MeSH Terms])) AND (Diet, Food, and Nutrition[MeSH Terms])) AND (((evaluation) OR (evaluation method)) OR (evaluation tool)) OR (evaluation indicator))) AND (nutrients[MeSH Terms])) AND (method)                                                                                                                                                                                                                                                                                                                                           | 201 items  |
| Scopus         | (( ( TITLE-ABS-KEY ( food AND quality ) OR TITLE-ABS-KEY ( food AND qualities ) OR TITLE-ABS-KEY ( qualities, AND food ) OR TITLE-ABS-KEY ( quality, AND food ) ) ) AND ( TITLE-ABS-KEY ( diet, AND food, AND nutrition ) ) AND ( ( TITLE-ABS-KEY ( nutrients ) OR TITLE-ABS-KEY ( nutrient ) OR TITLE-ABS-KEY ( macronutrients ) OR TITLE-ABS-KEY ( macronutrient ) ) ) AND ( ( TITLE-ABS-KEY ( evaluation ) OR TITLE-ABS-KEY ( evaluation AND tool ) OR TITLE-ABS-KEY ( evaluation AND method ) OR TITLE-ABS-KEY ( evaluation AND indicator ) ) ) AND ( TITLE-ABS-KEY ( method ) ) | 169 items  |
